# Supplementary material for: Biological pathways via which the anthocyanin malvidin alleviated the murine colitis induced by Citrobacter rodentium
Source: Royal Society of Chemistry journal article supplement (doi:10.1039/d2fo02873e), 2022-12-20
Supplement: d2fo02873e1.pdf [file d2fo02873e1.pdf]

Supplementary file

**Biological pathways via which the anthocyanin malvidin alleviated the murine colitis induced  
by *Citrobacter rodentium***

Fang Liu, Allen D. Smith, Thomas T. Y. Wang, Quynhchi Pham, Lumei Cheung,  
Haiyan Yang, Robert W. Li

**Figure S1.** The colon weight (A) and the spleen index (the ratio of spleen weight to the total bodyweight) affected by *Citrobacter rodentium* infection and malvidin 3-glycoside supplementation in mice. NC: uninfected mice supplemented with PBS for 17 days. CM: *Citrobacter rodentium* infected mice supplemented with PBS for 17 days. MG: *Citrobacter rodentium* infected mice supplemented with malvidin 3-glycoside at 4.0 mg/kg bodyweight/day for a total of 17 days. \*  $p < 0.05$ ; \*\*\*  $p < 0.001$ .

A.

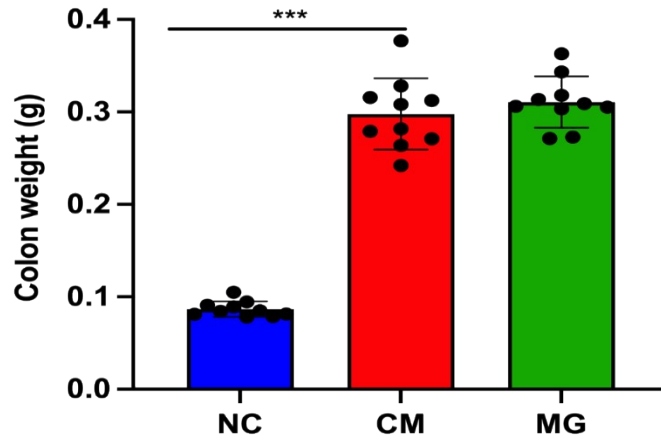

B.

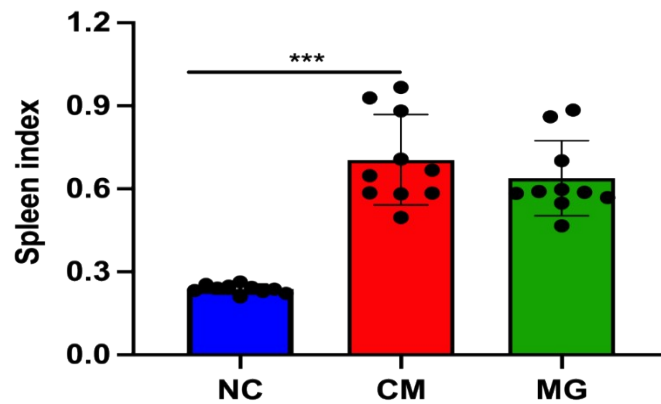

**Figure S2.** The colon histology score impacted by malvidin supplementation in mice infected by *Citrobacter rodentium*. CM: *Citrobacter rodentium* infected mice supplemented with PBS for 17 days. MG: *Citrobacter rodentium* infected mice supplemented with malvidin 3-glycoside at 4.0 mg/kg bodyweight/day for a total of 17 days.

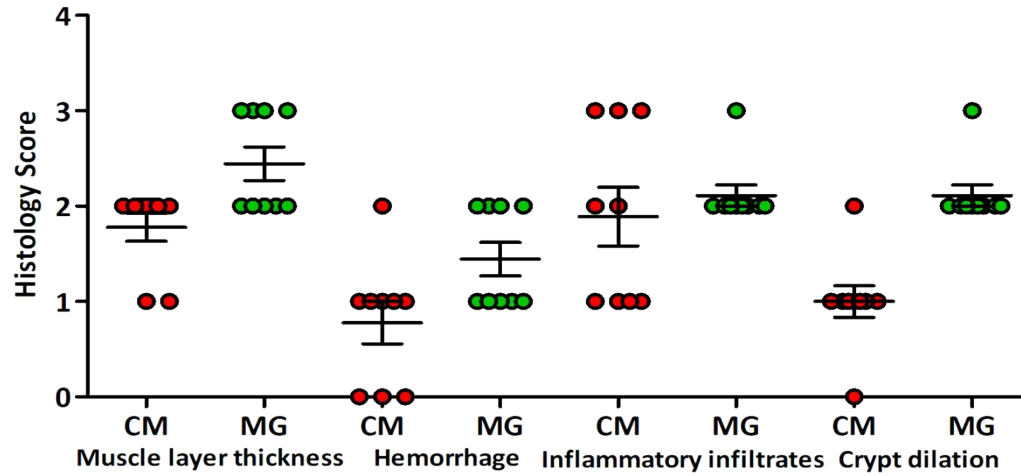

**Figure S3.** The colon transcriptome features, including genes and pathways, significantly regulated by *Citrobacter rodentium*. NC: uninfected mice supplemented with PBS for 17 days. CM: *Citrobacter rodentium* infected mice supplemented with PBS for 17 days. A: Volcano plot of RNAseq data. The  $\log_2$  (FC) (fold change) is plotted on the x-axis, and the negative  $\log_{10}$   $p$ -value is plotted on the y-axis. B to F: Select pathways enriched among the genes significantly regulated in mice with by *Citrobacter rodentium* infection, compared to the uninfected control mice. NES: normalized enrichment score. FDR: false discovery rate.

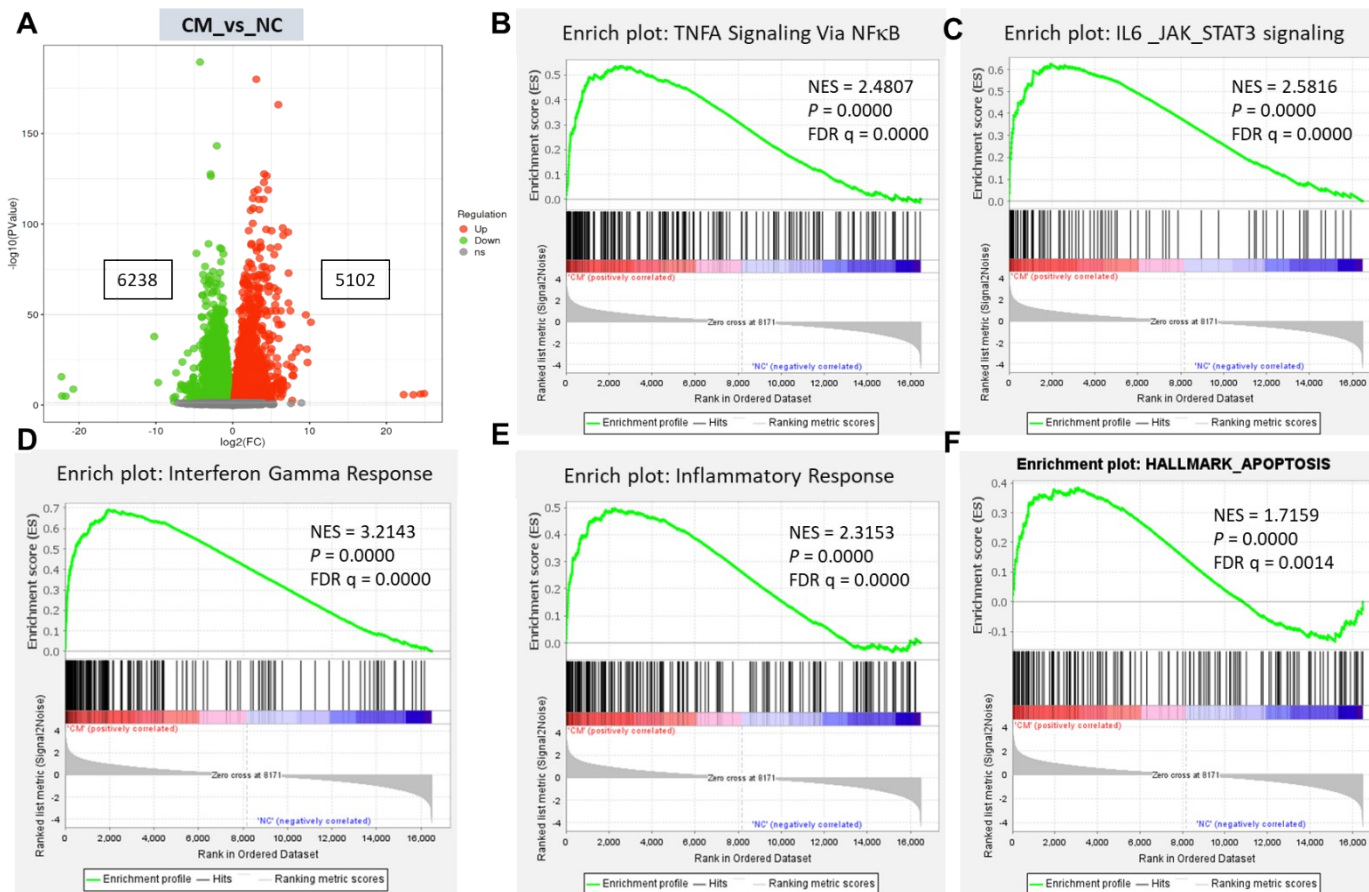

**Figure S4.** The origin of fecal metabolites predicted using MetOrigin. The origin of these metabolites includes those derived from either the host, or microbiota, or from both the host and microbiota (Co-metabolism) as well as others.

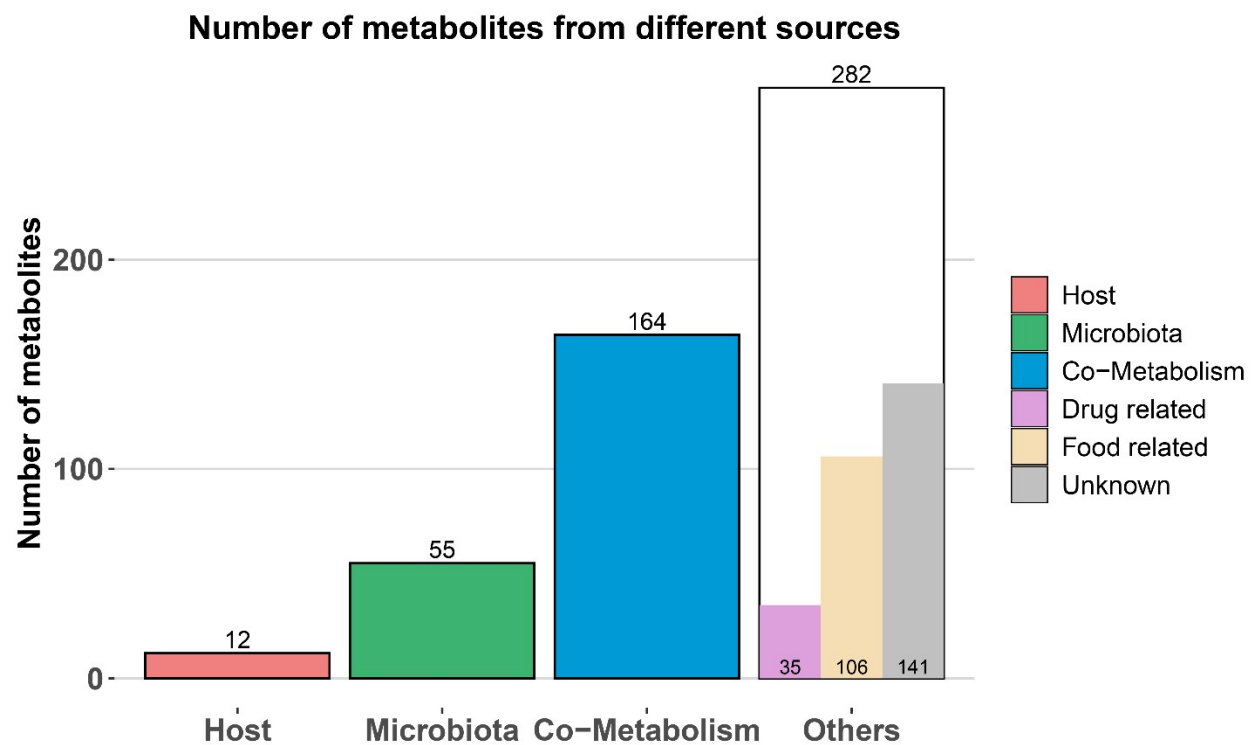

**Table S1.** The abundance of select bacterial species significantly changed by *Citrobacter rodentium* infection in mice. NC: uninfected mice supplemented with PBS for 17 days. CM: *Citrobacter rodentium* infected mice supplemented with PBS for 17 days. MG: *Citrobacter rodentium* infected mice supplemented with malvidin 3-glycoside at 4.0 mg/kg bodyweight/day for a total of 17 days. The number denotes the mean relative abundance  $\pm$  SD.

| Species                           | NC                  | CM                  | MG                  | LDA score | P value |
|-----------------------------------|---------------------|---------------------|---------------------|-----------|---------|
| <i>Unassigned_Olsenella</i>       | 0.0823 $\pm$ 0.1468 | 0.3506 $\pm$ 0.4108 | 0.1592 $\pm$ 0.1299 | 3.2080    | 0.0471  |
| <i>Alistipes_finegoldii</i>       | 0.0000 $\pm$ 0.0000 | 0.2979 $\pm$ 0.3353 | 0.1696 $\pm$ 0.1116 | 3.2985    | 0.0003  |
| <i>Lactobacillus_vaginalis</i>    | 0.0648 $\pm$ 0.1432 | 0.6825 $\pm$ 0.7836 | 0.2210 $\pm$ 0.2966 | 3.5585    | 0.0157  |
| <i>Clostridium_perfringens</i>    | 0.0018 $\pm$ 0.0057 | 2.6850 $\pm$ 3.9923 | 3.3158 $\pm$ 4.3089 | 4.2516    | 0.0072  |
| <i>Clostridium_glycolicum</i>     | 0.0000 $\pm$ 0.0000 | 0.2659 $\pm$ 0.2481 | 0.2011 $\pm$ 0.3160 | 3.2920    | 0.0003  |
| <i>Clostridium_sordellii</i>      | 0.0000 $\pm$ 0.0000 | 0.2676 $\pm$ 0.3978 | 1.1291 $\pm$ 1.2029 | 3.2925    | 0.0221  |
| <i>Unassigned_Anaerotruncus</i>   | 0.3325 $\pm$ 0.2354 | 1.2694 $\pm$ 0.7069 | 1.0911 $\pm$ 0.5354 | 3.6914    | 0.0015  |
| <i>Clostridium_cocleatum</i>      | 1.4258 $\pm$ 0.9253 | 2.5707 $\pm$ 1.5494 | 2.5541 $\pm$ 0.9775 | 3.7121    | 0.0143  |
| <i>Unassigned_Sutterella</i>      | 0.0000 $\pm$ 0.0000 | 1.6701 $\pm$ 1.6886 | 0.9985 $\pm$ 1.2407 | 3.9753    | 0.0003  |
| <i>Escherichia_coli</i>           | 0.1599 $\pm$ 0.5056 | 0.3158 $\pm$ 0.5300 | 0.0620 $\pm$ 0.1403 | 3.2423    | 0.0109  |
| <i>Citrobacter_rodentium</i>      | 0.0000 $\pm$ 0.0000 | 3.8477 $\pm$ 3.2648 | 7.9446 $\pm$ 9.6738 | 4.3423    | 0.0001  |
| <i>Unassigned_Coproccoccus</i>    | 0.7919 $\pm$ 0.4122 | 0.2006 $\pm$ 0.1939 | 0.3041 $\pm$ 0.3039 | 3.5621    | 0.0006  |
| <i>Ruminococcus_gnavus</i>        | 1.9307 $\pm$ 0.7485 | 1.1877 $\pm$ 0.6424 | 0.6436 $\pm$ 0.4298 | 3.5784    | 0.0222  |
| <i>Butyrivibrio_pullicaecorum</i> | 0.0862 $\pm$ 0.0939 | 0.0193 $\pm$ 0.0578 | 0.0168 $\pm$ 0.0505 | 3.0663    | 0.0476  |
| <i>Unassigned_RF32</i>            | 0.3607 $\pm$ 0.3110 | 0.0931 $\pm$ 0.2431 | 0.0751 $\pm$ 0.1536 | 3.2543    | 0.0198  |
| <i>Unassigned_Adlercreutzia</i>   | 0.4919 $\pm$ 0.3032 | 0.1011 $\pm$ 0.1738 | 0.1477 $\pm$ 0.1661 | 3.4583    | 0.0044  |

**Table S2.** The fecal metabolites significantly dysregulated by *Citrobacter rodentium* infection and malvidin 3-glucoside supplementation. NC: uninfected mice supplemented with PBS for 17 days. CM: *Citrobacter rodentium* infected mice supplemented with PBS for 17 days. MG: *Citrobacter rodentium* infected mice supplemented with malvidin 3-glycoside at 4.0 mg/kg bodyweight/day for a total of 17 days. The number denotes the mean ion counts  $\pm$  SD. The origin of metabolites was inferred using the MetOrigin algorithm.

| Name                        | Origin        | NC                        | CM                      | MG                      | Fold  | <i>p</i> (NC vs CM) | <i>p</i> (CM vs MG) |
|-----------------------------|---------------|---------------------------|-------------------------|-------------------------|-------|---------------------|---------------------|
| N-Acetylputrescine          | Co-Metabolism | 1.1189 $\pm$ 1.4831       | 10.1703 $\pm$ 5.0177    | 6.314 $\pm$ 2.291       | 29.48 | 0.0023              |                     |
| Squalene                    | Co-Metabolism | 0.3889 $\pm$ 0.0647       | 4.1974 $\pm$ 1.6932     | 3.0676 $\pm$ 1.1509     | 9.96  | 0.0012              |                     |
| Oleic acid                  | Co-Metabolism | 4.8093 $\pm$ 4.9246       | 5.4285 $\pm$ 3.6158     | 5.341 $\pm$ 2.8399      | 7.18  | 0.0082              |                     |
| Palmitoylcarnitine          | Co-Metabolism | 9.4341 $\pm$ 3.8369       | 65.7881 $\pm$ 20.4861   | 64.3342 $\pm$ 24.6927   | 6.64  | 0.0012              |                     |
| Ceramide (d18:1/16:0)       | Co-Metabolism | 16.4381 $\pm$ 5.6982      | 236.5944 $\pm$ 394.8973 | 70.6582 $\pm$ 70.0082   | 5.01  | 0.0012              |                     |
| LysoPC(18:1(9Z)/0:0)        | Co-Metabolism | 29.4715 $\pm$ 11.229      | 111.7864 $\pm$ 52.3429  | 94.2455 $\pm$ 55.1077   | 4.30  | 0.0023              |                     |
| LysoPC(18:0/0:0)            | Co-Metabolism | 167.4379 $\pm$ 94.223     | 567.3946 $\pm$ 249.5765 | 382.2711 $\pm$ 191.5647 | 3.54  | 0.0047              |                     |
| Formiminoglutamic acid      | Co-Metabolism | 12.8268 $\pm$ 10.9939     | 11.678 $\pm$ 6.1249     | 23.7389 $\pm$ 27.8749   | 3.49  | 0.0047              |                     |
| Adenosine monophosphate     | Co-Metabolism | 0.9061 $\pm$ 0.3703       | 2.2868 $\pm$ 0.8307     | 2.1054 $\pm$ 1.0182     | 3.36  | 0.0082              |                     |
| L-Proline                   | Co-Metabolism | 6.2264 $\pm$ 2.7397       | 7.911 $\pm$ 2.8155      | 6.699 $\pm$ 2.288       | 2.95  | 0.0082              |                     |
| Glycerol                    | Co-Metabolism | 0.2344 $\pm$ 0.1885       | 0.9334 $\pm$ 0.8887     | 0.4237 $\pm$ 0.1513     | 2.88  | 0.0350              |                     |
| Serotonin                   | Co-Metabolism | 0.9959 $\pm$ 0.6129       | 2.1399 $\pm$ 0.4161     | 2.0793 $\pm$ 0.8743     | 2.48  | 0.0082              |                     |
| N6,N6,N6-Trimethyl-L-lysine | Co-Metabolism | 2.2164 $\pm$ 1.1474       | 5.046 $\pm$ 1.5498      | 4.7257 $\pm$ 0.9094     | 2.32  | 0.0082              |                     |
| 5-Hydroxy-L-tryptophan      | Co-Metabolism | 0.7597 $\pm$ 0.2983       | 1.5992 $\pm$ 0.5496     | 1.9882 $\pm$ 0.291      | 2.19  | 0.0221              |                     |
| LysoPC(18:2(9Z,12Z)/0:0)    | Co-Metabolism | 4.2035 $\pm$ 1.6316       | 9.6513 $\pm$ 3.6322     | 8.0804 $\pm$ 3.6966     | 1.83  | 0.0023              |                     |
| L-Alanine                   | Co-Metabolism | 64.9977 $\pm$ 14.9276     | 92.2769 $\pm$ 22.4124   | 78.3869 $\pm$ 22.7049   | 1.44  | 0.0350              |                     |
| Hypoxanthine                | Co-Metabolism | 250.3712 $\pm$<br>49.3284 | 131.9108 $\pm$ 87.2681  | 221.9368 $\pm$ 138.3963 | 0.55  | 0.0082              |                     |
| Estradiol                   | Co-Metabolism | 1.9983 $\pm$ 0.3911       | 0.9276 $\pm$ 0.4978     | 0.6073 $\pm$ 0.2025     | 0.46  | 0.0023              |                     |
| Ureidopropionic acid        | Co-Metabolism | 11.3101 $\pm$ 4.0908      | 4.3775 $\pm$ 1.6639     | 9.367 $\pm$ 3.3596      | 0.43  | 0.0012              | 0.0053              |
| SM(d18:1/16:0)              | Co-Metabolism | 1.4144 $\pm$ 0.474        | 0.4179 $\pm$ 0.1633     | 2.2827 $\pm$ 0.6427     | 0.33  | 0.0012              | 0.0000              |
| Bilirubin                   | Co-Metabolism | 14.8996 $\pm$ 12.4967     | 6.6193 $\pm$ 6.0692     | 8.3942 $\pm$ 7.8876     | 0.33  | 0.0082              |                     |
| Guanine                     | Co-Metabolism | 3.1928 $\pm$ 3.0962       | 3.5521 $\pm$ 2.5029     | 3.0208 $\pm$ 2.1667     | 0.29  | 0.0023              |                     |

|                               |               |                        |                     |                     |       |        |        |
|-------------------------------|---------------|------------------------|---------------------|---------------------|-------|--------|--------|
| Cytidine                      | Co-Metabolism | 3.3614 ± 2.1743        | 2.9756 ± 1.9853     | 3.7144 ± 2.8145     | 0.25  | 0.0012 |        |
| Indoleacetaldehyde            | Co-Metabolism | 3.2411 ± 1.4373        | 1.008 ± 0.7827      | 1.0281 ± 0.7333     | 0.22  | 0.0047 |        |
| Chenodeoxycholic acid         | Co-Metabolism | 1.5459 ± 0.6886        | 0.4676 ± 0.3377     | 0.7885 ± 0.8076     | 0.20  | 0.0221 |        |
| Adenine                       | Co-Metabolism | 5.4195 ± 6.0782        | 11.1097 ± 10.4786   | 7.7146 ± 4.8749     | 0.12  | 0.0012 |        |
| Ibuprofen                     | Drug related  | 1.0995 ± 0.5975        | 0.2864 ± 0.3219     | 0.7337 ± 0.9815     | 0.17  | 0.0221 |        |
| LysoPE(18:1(9Z)/0:0)          | Food related  | 7.9332 ± 2.4161        | 8.7991 ± 4.7369     | 7.8142 ± 2.3119     | 29.66 | 0.0012 |        |
| 2-Nonenoic acid               | Food related  | 0.199 ± 0.227          | 2.1135 ± 2.394      | 0.9652 ± 0.6797     | 9.86  | 0.0082 |        |
| Tridecanal                    | Food related  | 0.0656 ± 0.0753        | 0.7856 ± 0.9219     | 0.318 ± 0.22        | 9.66  | 0.0082 |        |
| 6-Methyl-3,5-heptadien-2-one  | Food related  | 0.3638 ± 0.3384        | 3.3425 ± 3.8205     | 1.5115 ± 0.9934     | 6.43  | 0.0140 |        |
| Methyl cyclohexanecarboxylate | Food related  | 0.1639 ± 0.1505        | 1.4918 ± 1.677      | 0.6983 ± 0.5174     | 5.81  | 0.0082 |        |
| LysoPC(0:0/16:0)              | Food related  | 167.1232 ±<br>62.4088  | 639.3551 ± 163.9647 | 498.7405 ± 188.2891 | 4.47  | 0.0012 |        |
| N-Oleoylethanolamine (OEA)    | Food related  | 1.2731 ± 0.2942        | 4.3487 ± 2.1688     | 2.0165 ± 0.7064     | 3.81  | 0.0012 | 0.0240 |
| 3-Methyl-2-cyclohexen-1-one   | Food related  | 0.2882 ± 0.1773        | 2.1525 ± 2.43       | 0.9928 ± 0.7065     | 3.79  | 0.0082 |        |
| 5,8,11-Eicosatrienoic acid    | Food related  | 0.6155 ± 0.9148        | 1.5193 ± 1.7145     | 1.4741 ± 2.2441     | 3.69  | 0.0023 |        |
| gamma-Glutamylleucine         | Food related  | 9.2415 ± 8.4199        | 6.9365 ± 6.1514     | 9.612 ± 5.8513      | 3.37  | 0.0082 |        |
| Docosapentaenoic acid (22n-3) | Food related  | 0.7005 ± 0.1144        | 2.8823 ± 1.6648     | 1.5558 ± 0.6563     | 3.13  | 0.0012 |        |
| Symmetric dimethylarginine    | Food related  | 4.8073 ± 3.395         | 11.0121 ± 5.2605    | 7.7724 ± 0.9303     | 2.78  | 0.0350 |        |
| Aspartyllysine                | Food related  | 3.3461 ± 1.1791        | 11.1456 ± 11.5649   | 10.5307 ± 4.3357    | 2.43  | 0.0350 |        |
| 3-Aminobutanoic acid          | Food related  | 7.1598 ± 2.8488        | 20.7883 ± 9.5392    | 18.5469 ± 16.7767   | 2.34  | 0.0023 |        |
| Adrenic acid                  | Food related  | 1.9822 ± 0.3305        | 5.0929 ± 1.7867     | 4.0495 ± 1.0047     | 2.21  | 0.0012 |        |
| LysoPE(0:0/18:3(6Z,9Z,12Z))   | Food related  | 1.3082 ± 0.503         | 2.8693 ± 0.7328     | 2.4498 ± 0.5813     | 2.11  | 0.0023 |        |
| LysoPE(16:0/0:0)              | Food related  | 209.1989 ±<br>136.5898 | 105.7962 ± 117.7473 | 221.1029 ± 120.5725 | 2.08  | 0.0012 |        |
| 2,6-Di-tert-butylbenzoquinone | Food related  | 1.2268 ± 0.8981        | 0.3867 ± 0.138      | 0.4953 ± 0.222      | 0.46  | 0.0012 |        |
| 2(R)-hydroxydocosanoic acid   | Food related  | 12.8704 ± 8.7864       | 5.3895 ± 4.6386     | 22.6982 ± 11.3633   | 0.44  | 0.0221 | 0.0037 |
| beta-Alanyl-L-lysine          | Host          | 2.2592 ± 1.3749        | 5.3065 ± 1.7927     | 4.1126 ± 1.8815     | 3.17  | 0.0047 |        |
| Cytosine                      | Microbiota    | 67.9987 ± 16.8238      | 18.6541 ± 14.022    | 37.1268 ± 16.9667   | 0.20  | 0.0023 | 0.0395 |
| 4-Methylbenzaldehyde          | Microbiota    | 37.6155 ± 31.4417      | 66.9417 ± 33.24     | 78.5327 ± 56.4077   | 2.32  | 0.0082 |        |
| Indolelactic acid             | Microbiota    | 10.8099 ± 14.6424      | 21.8565 ± 14.4372   | 24.3267 ± 19.672    | 2.54  | 0.0221 |        |
| N-Acetylcadaverine            | Microbiota    | 0.2934 ± 0.3723        | 2.1579 ± 0.9262     | 2.1132 ± 1.2653     | 15.87 | 0.0023 |        |
